# Supplementary material for: Identification and validation of extracellular vesicle reference genes for the normalization of RT‐qPCR data
Source: PubMed Central journal article supplement — J Extracell Vesicles. 2024 Mar 28;13(4):e12421. doi: 10.1002/jev2.12421 (PMC10974686; doi:10.1002/jev2.12421), 2024-03-28

Fig S1

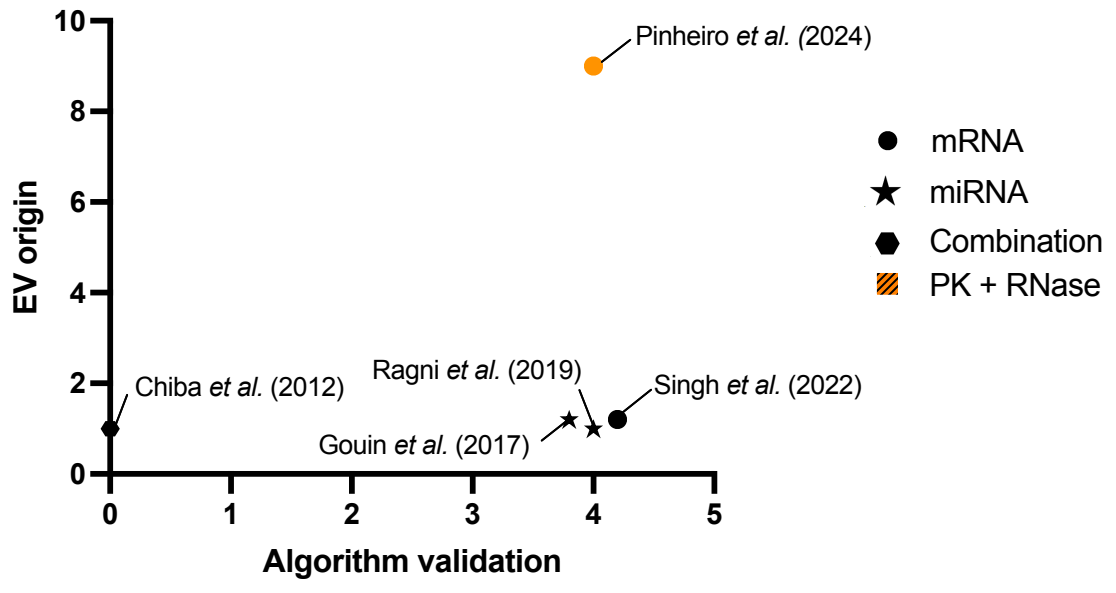



**Fig S3**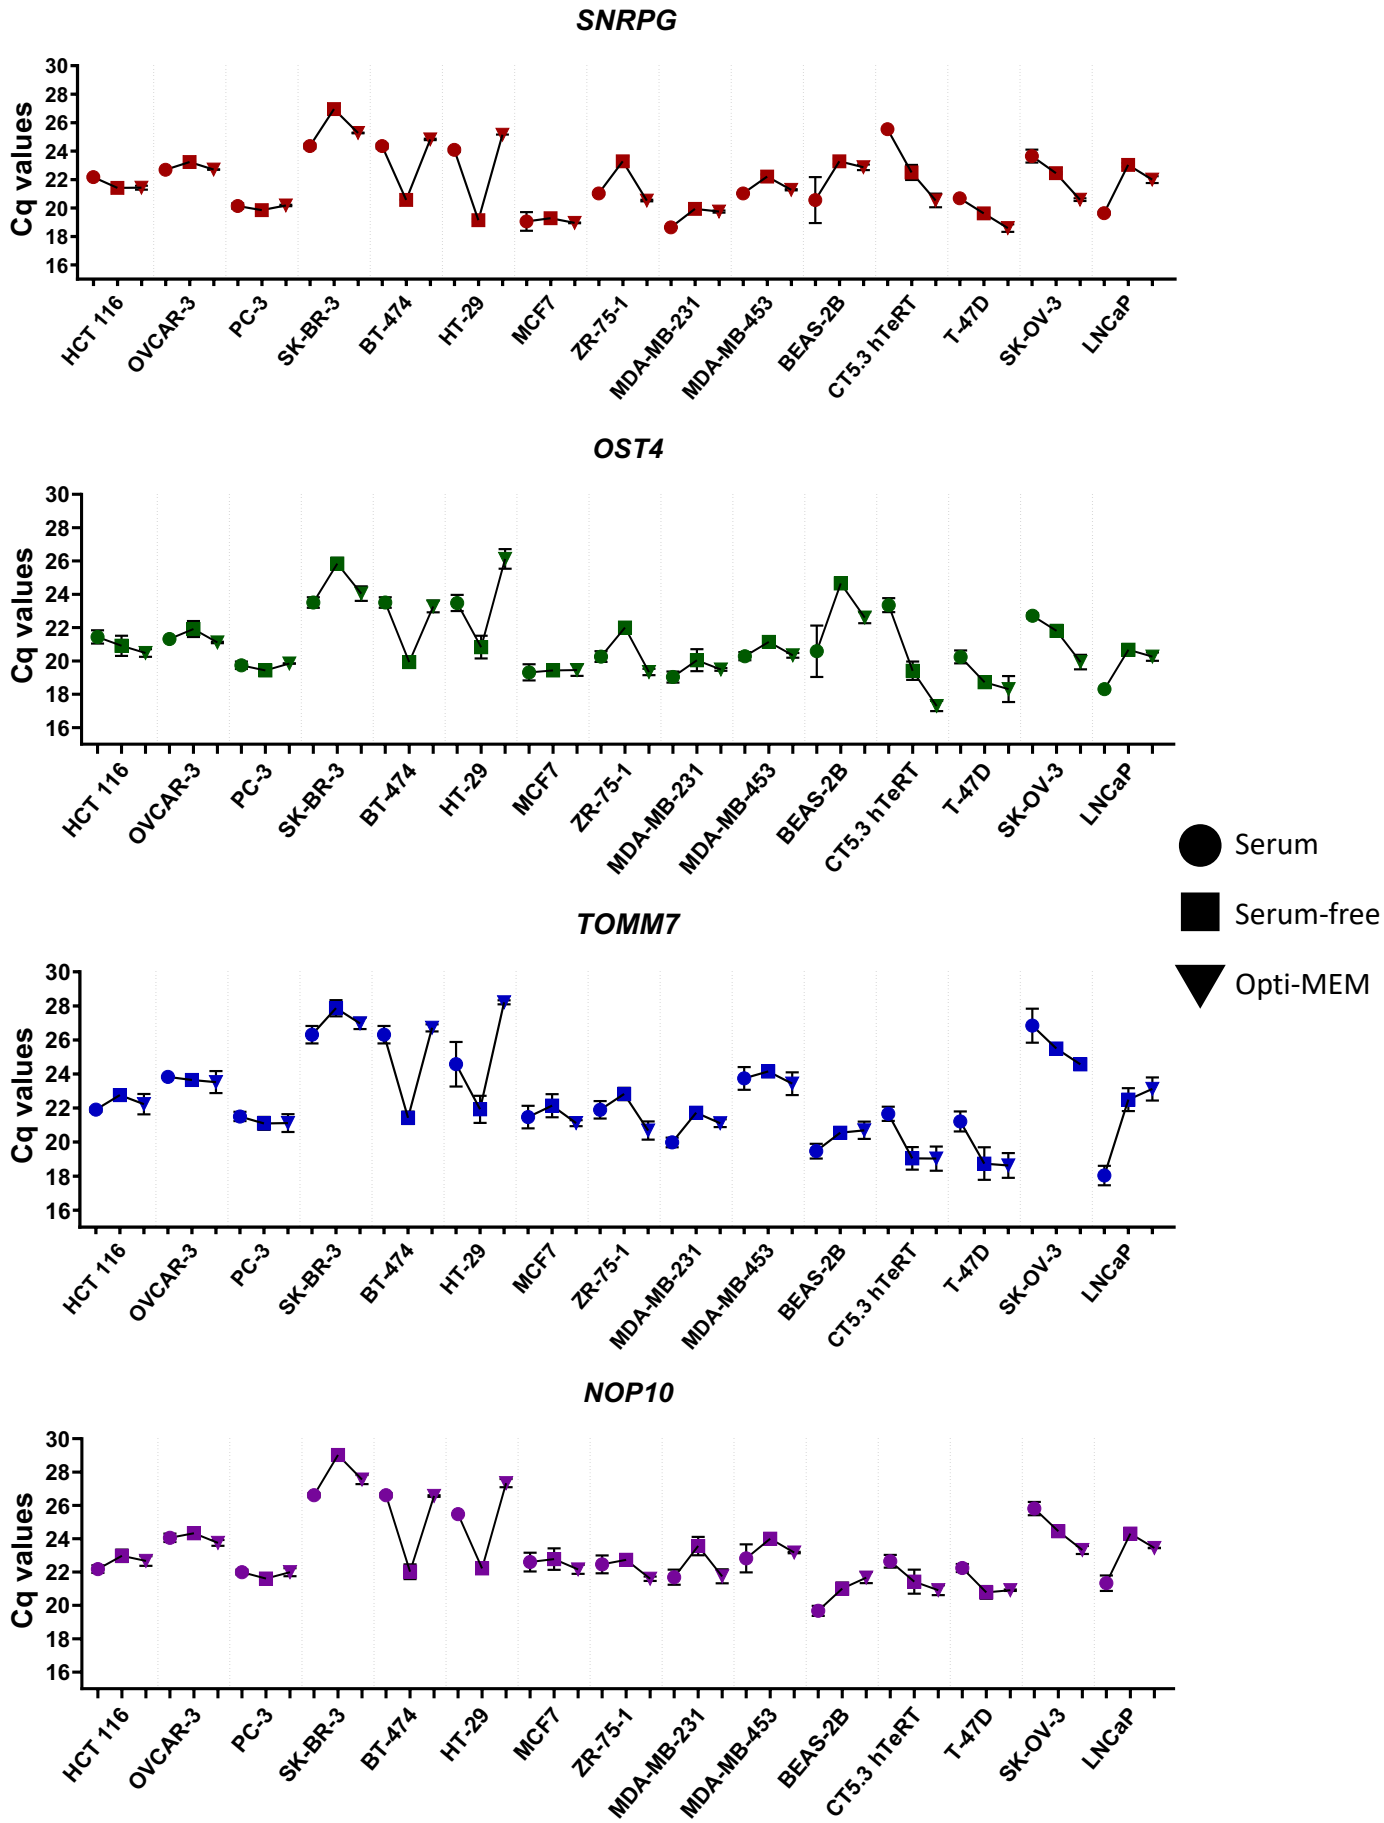

**Fig S4****A**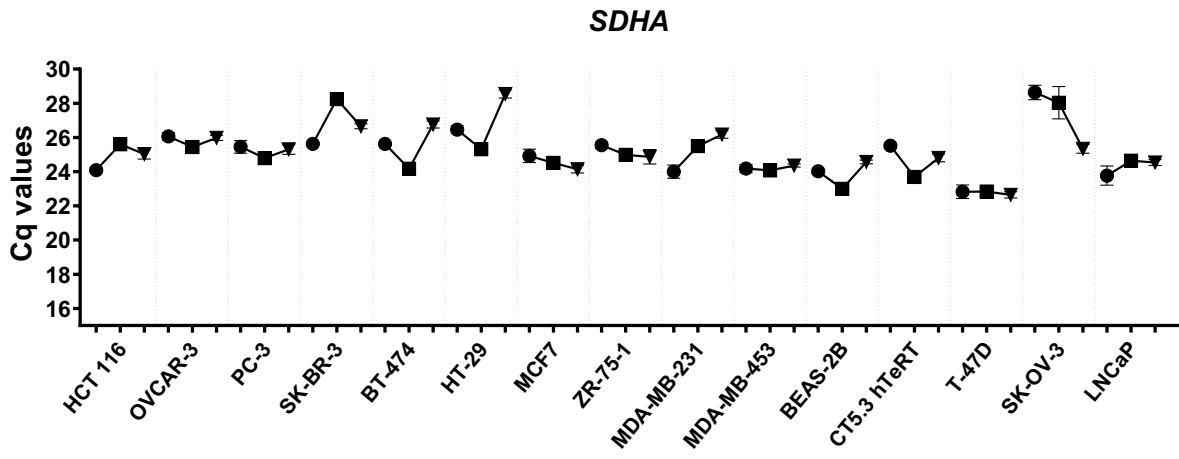**B**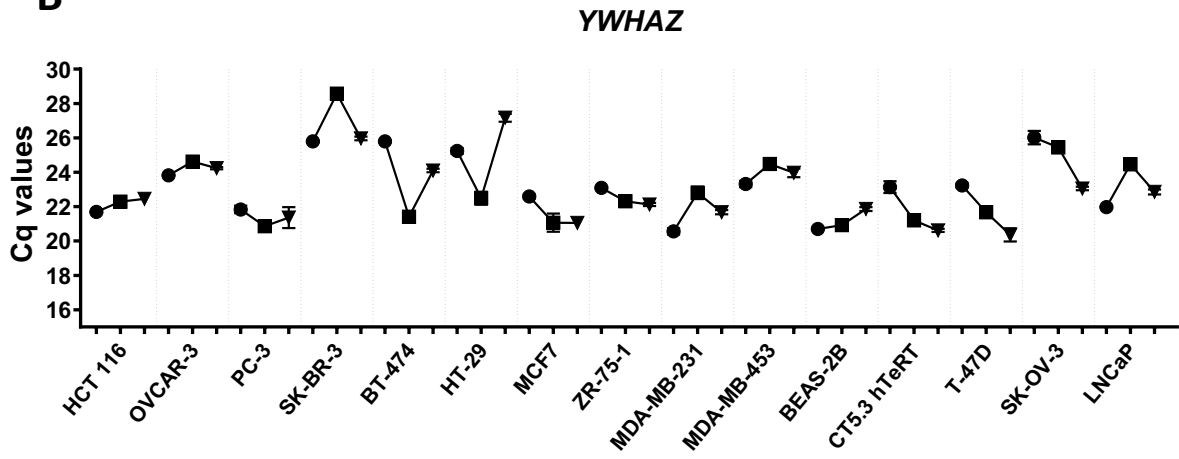**C**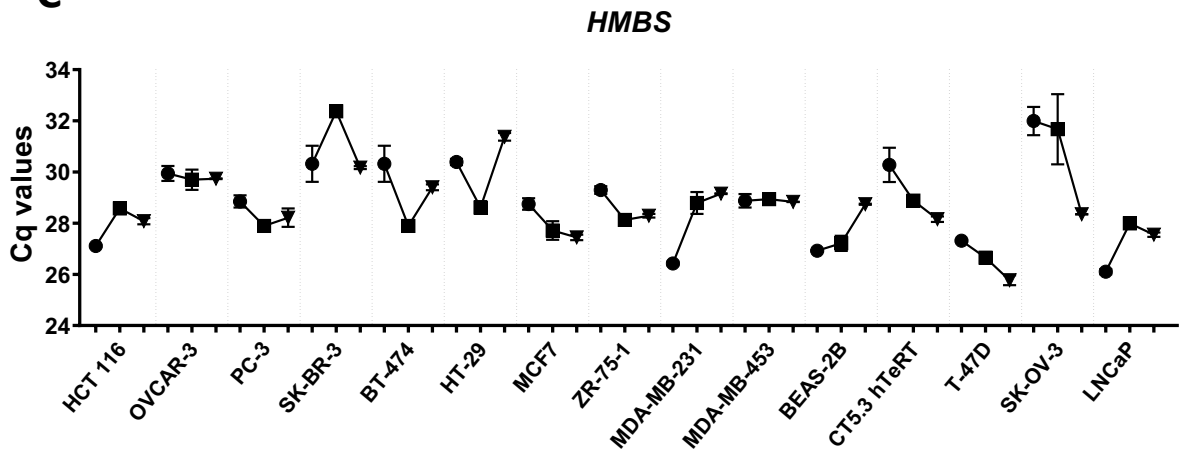

small EVs

---

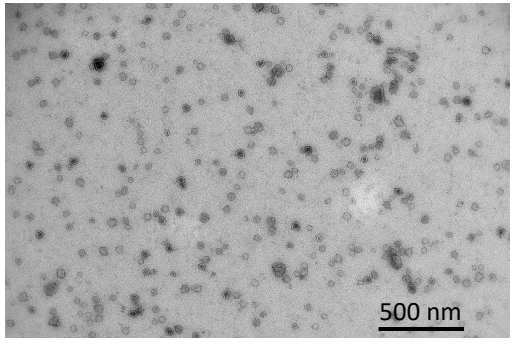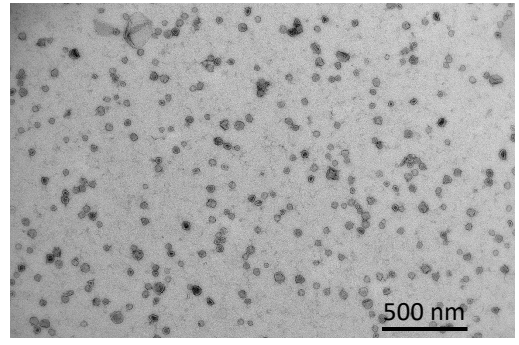

medium EVs

---

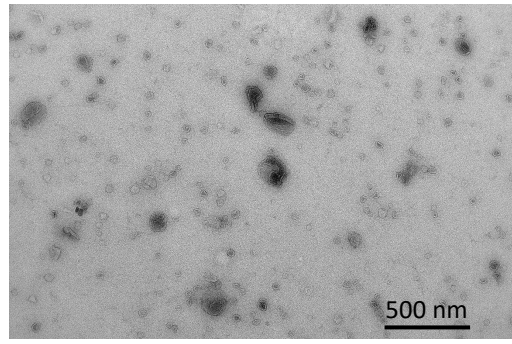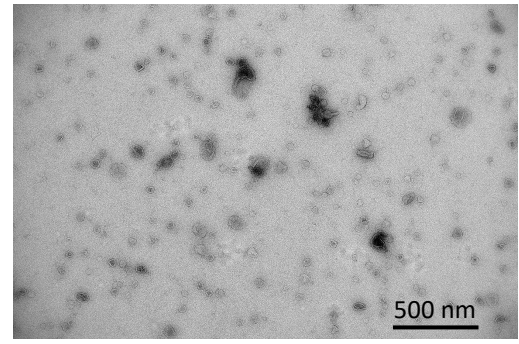

large EVs

---

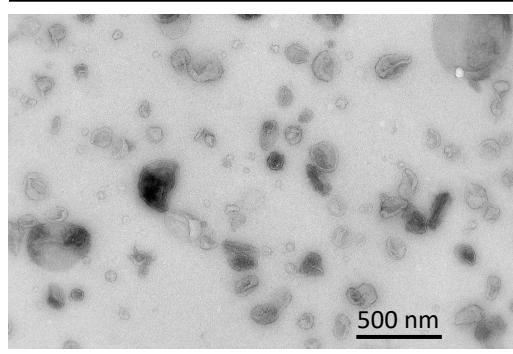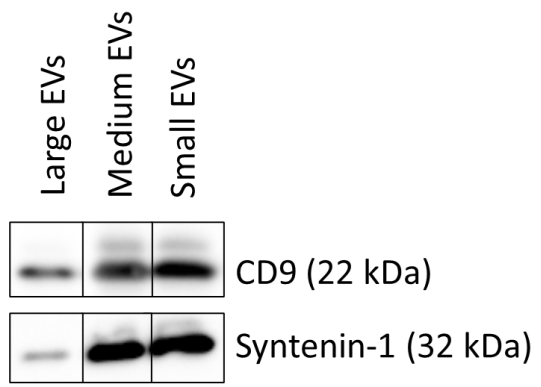

HCT 116

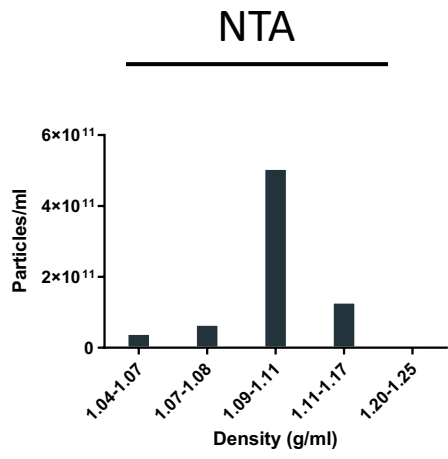

**WB**

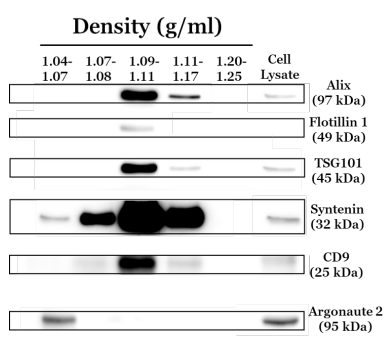

**TEM**

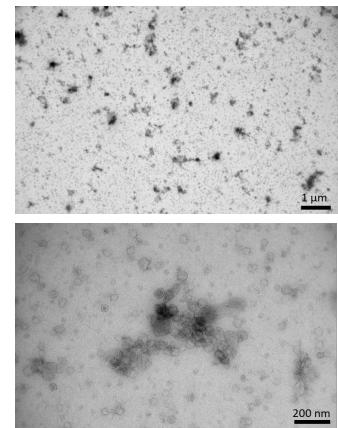

CT5.3 hTert

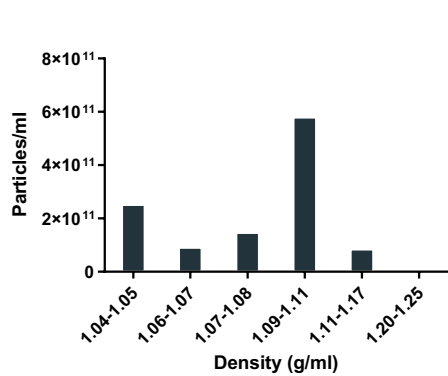

**Density (g/ml)**

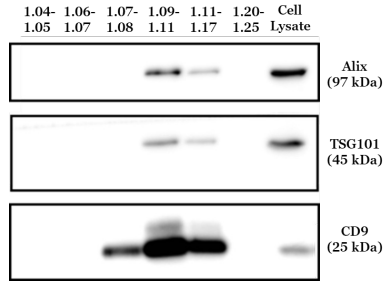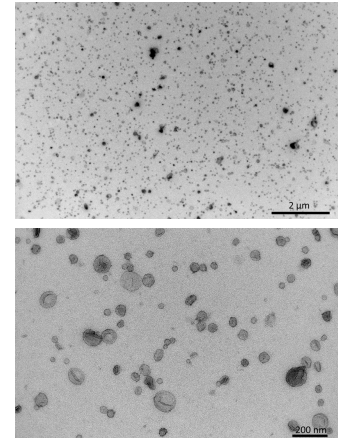

MCF7

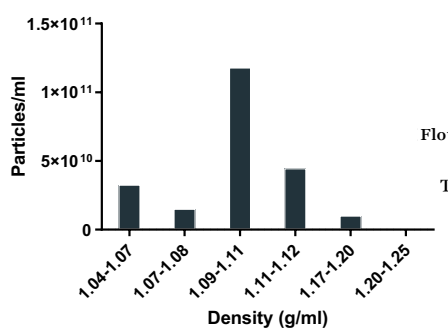

**Density (g/ml)**

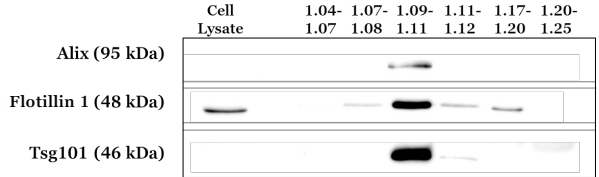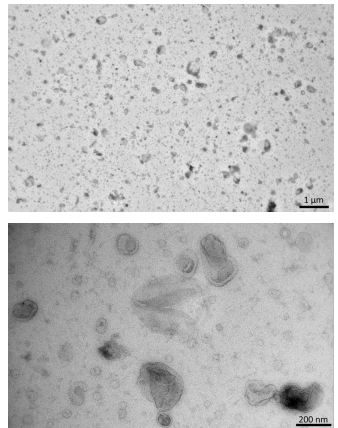

**Fig S7*****SNRPG***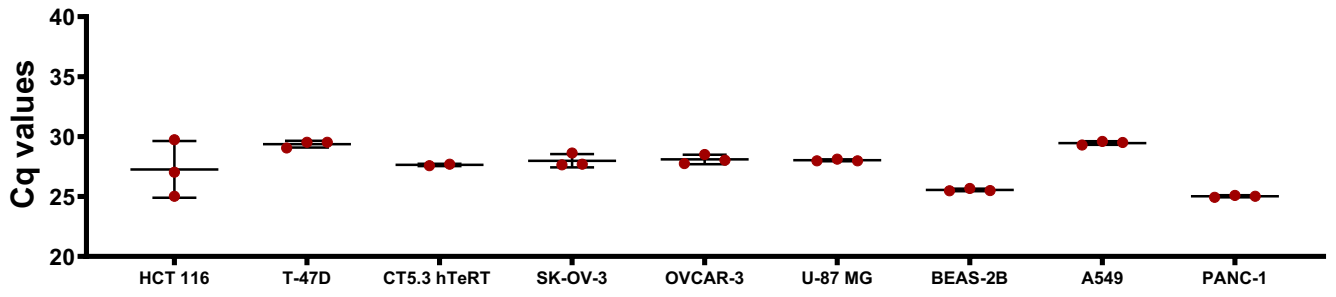***OST4***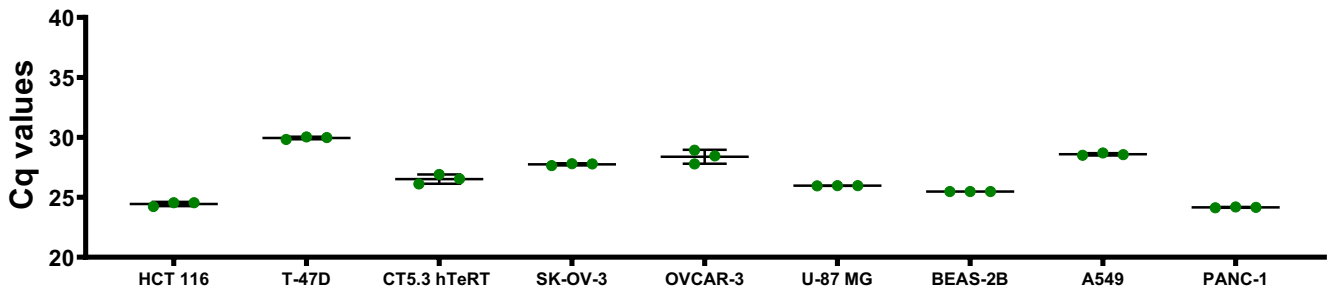***TOMM7***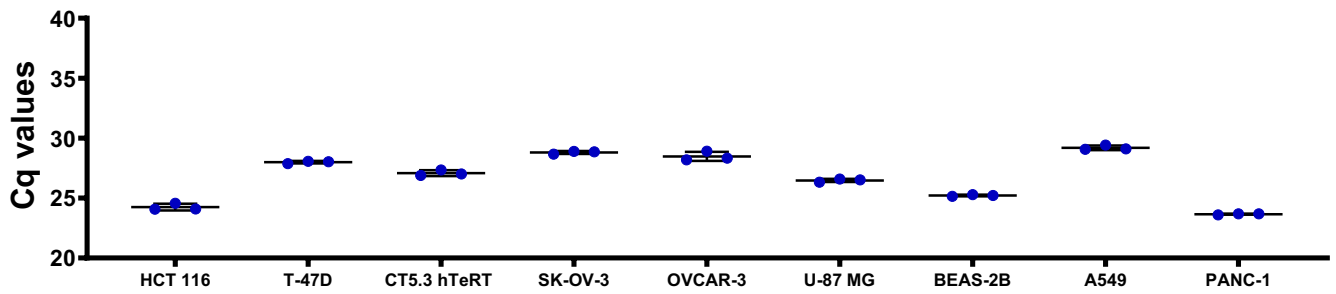***NOP10***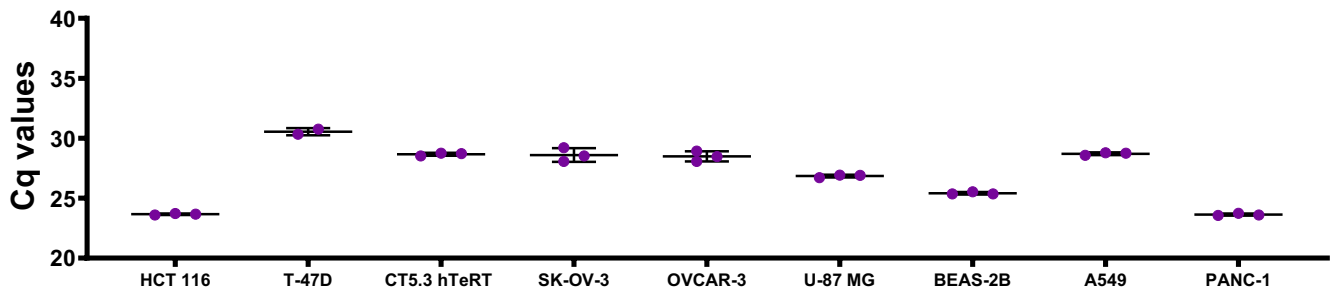

Fig S8

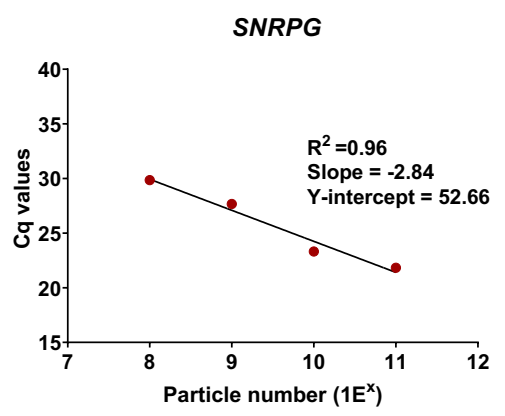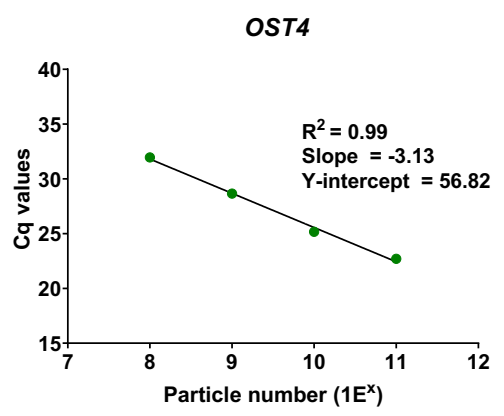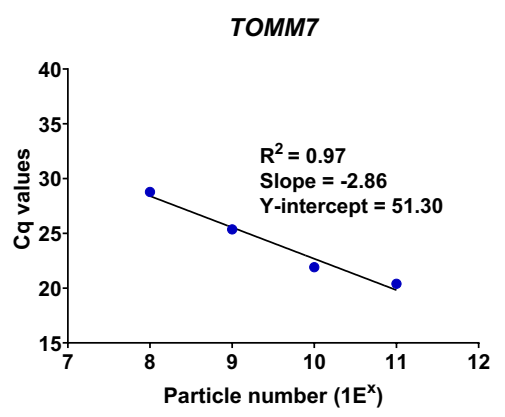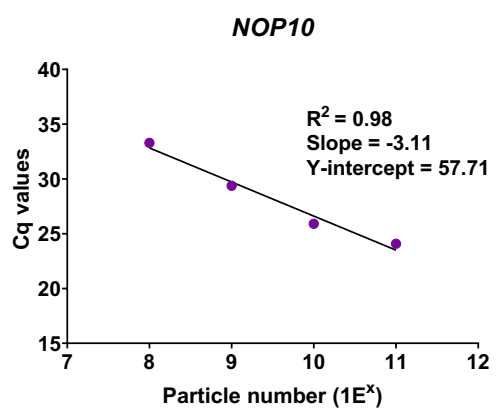



Fig S9

### LNCaP

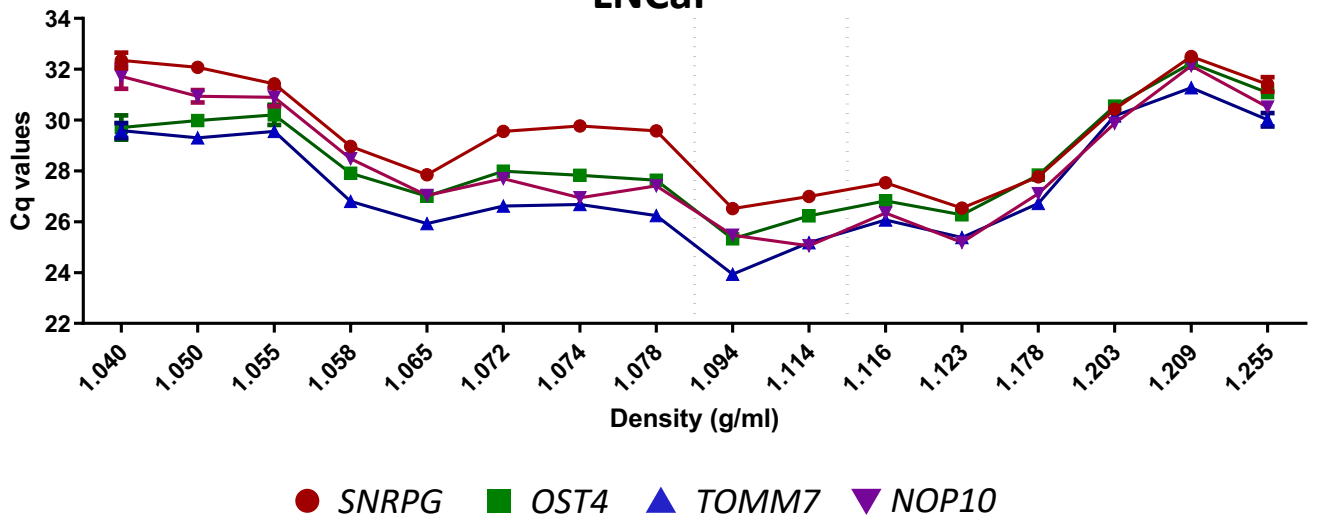

Fig S10

**A**

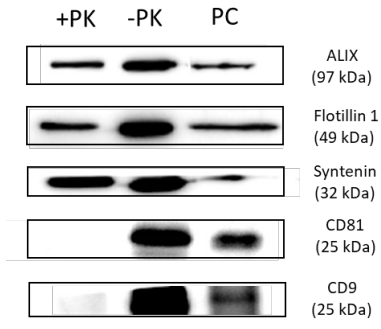

**B**

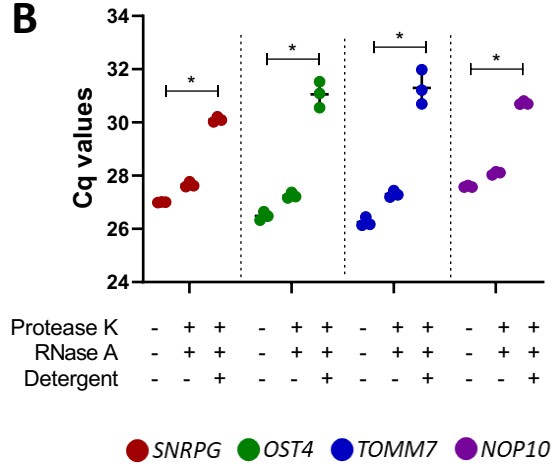

**Fig S11**

- Biological replicate 1
- ▲ Biological replicate 2
- ◆ Biological replicate 3

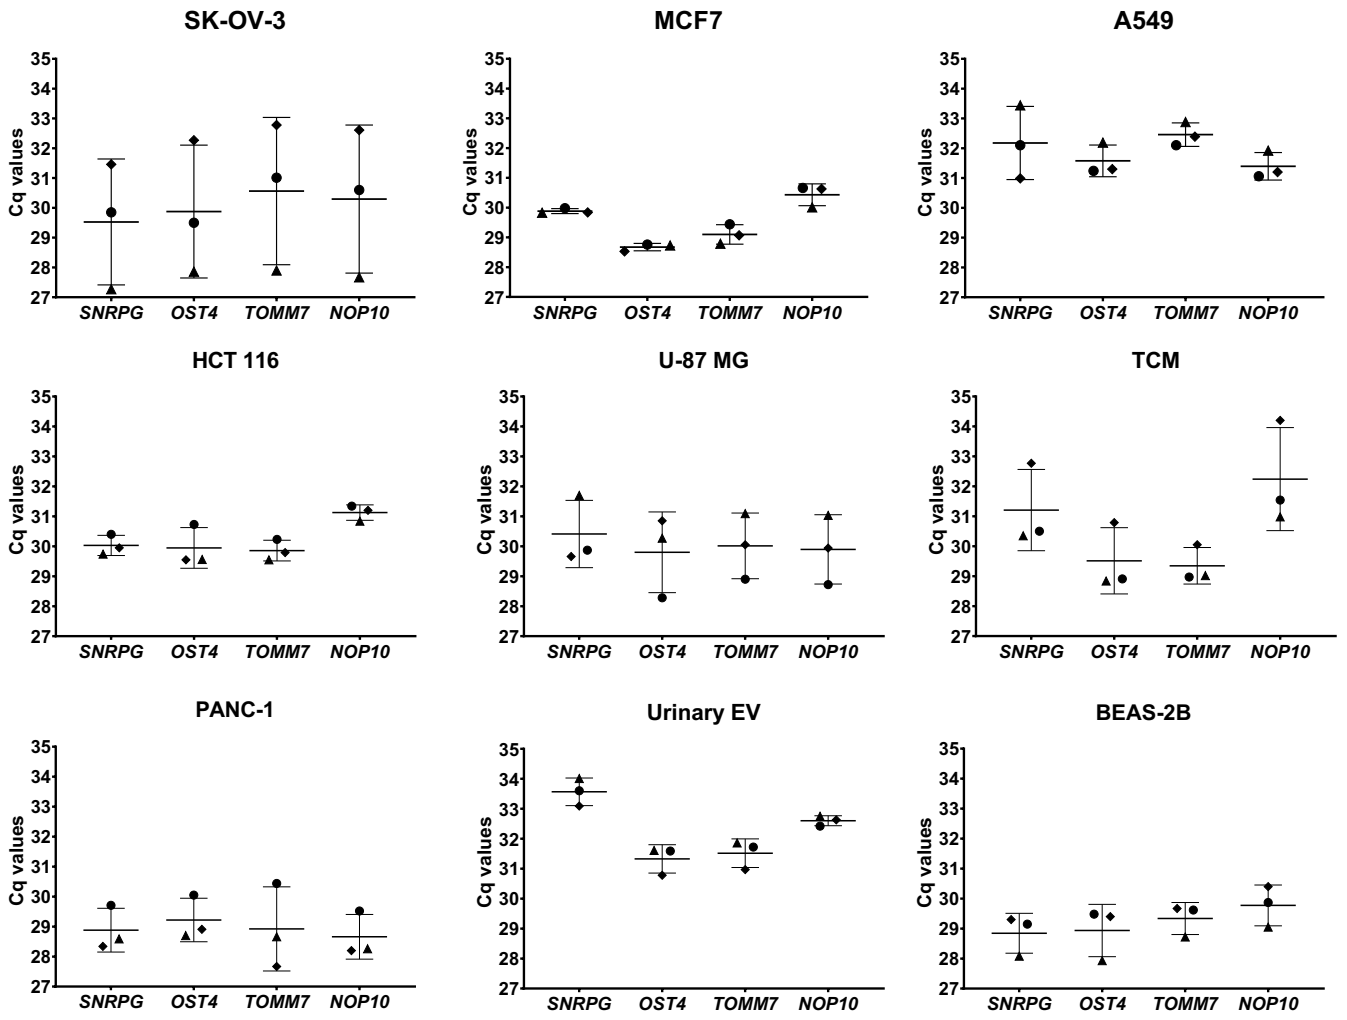

Fig S12

- Biological replicate 1
- ▲ Biological replicate 2
- ◆ Biological replicate 3

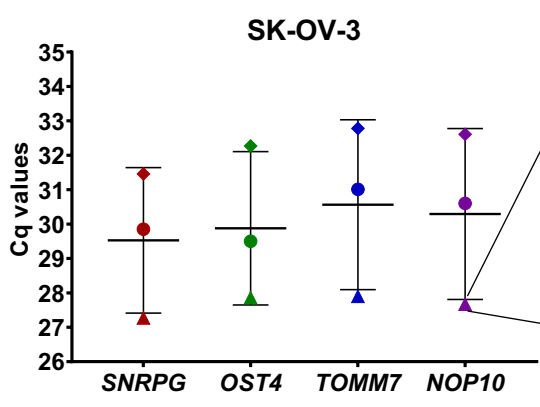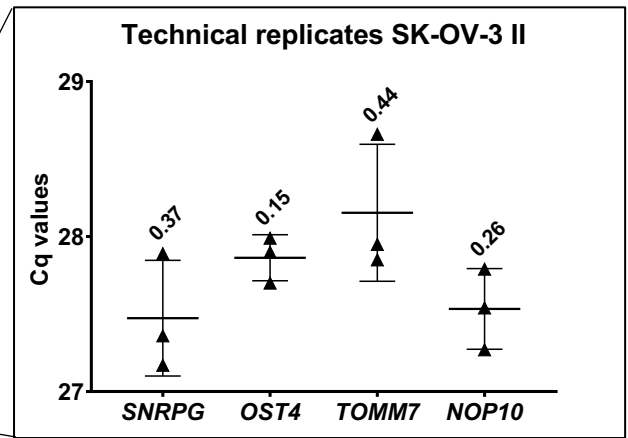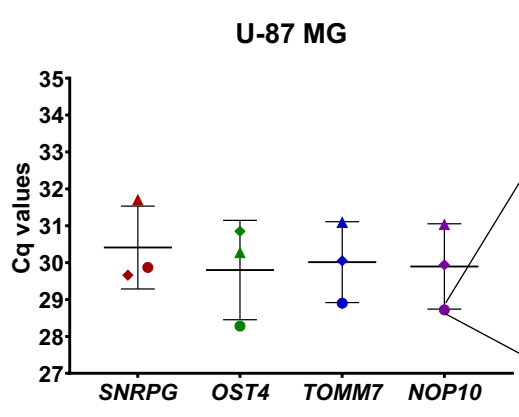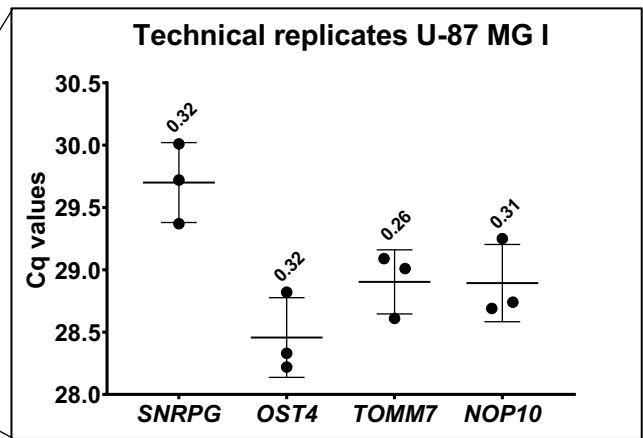

**Fig S13**

- Biological replicate 1
- ▲ Biological replicate 2
- ◆ Biological replicate 3

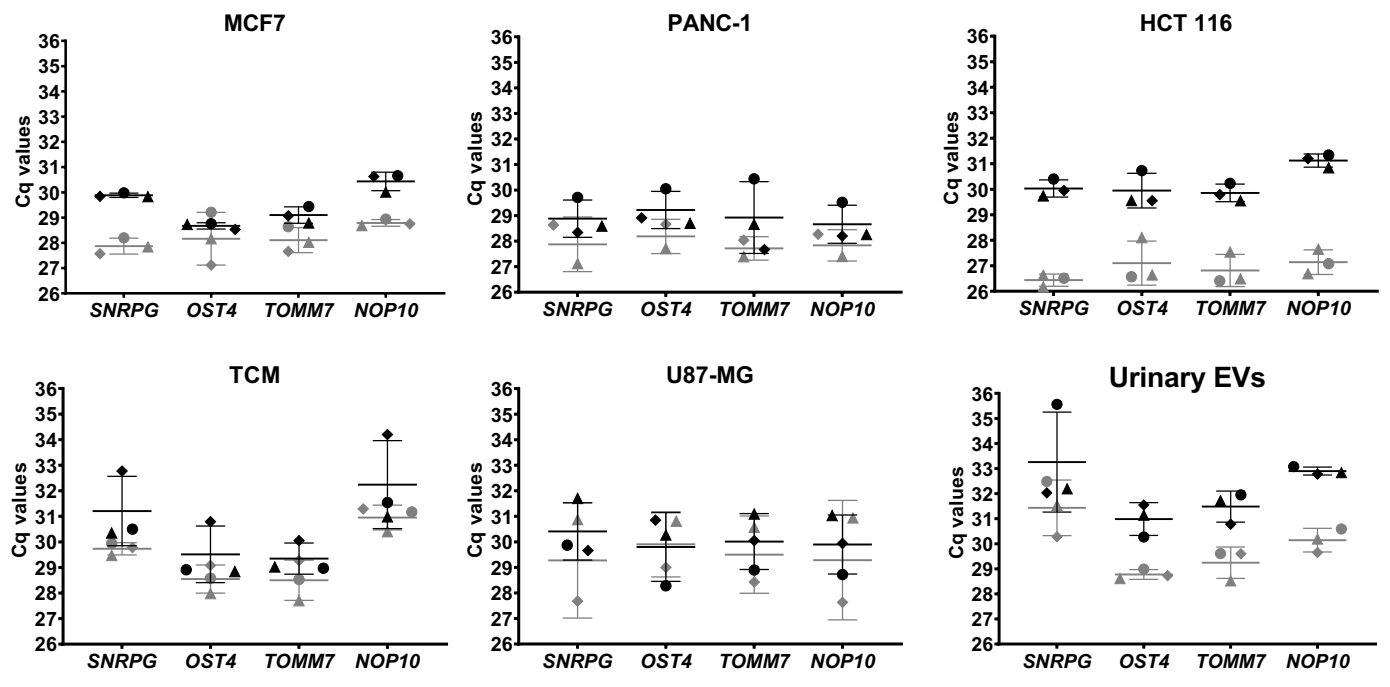

- $9 \times 10^9$  particles
- $1 \times 10^{11}$  particles

**Fig S14**

**A**

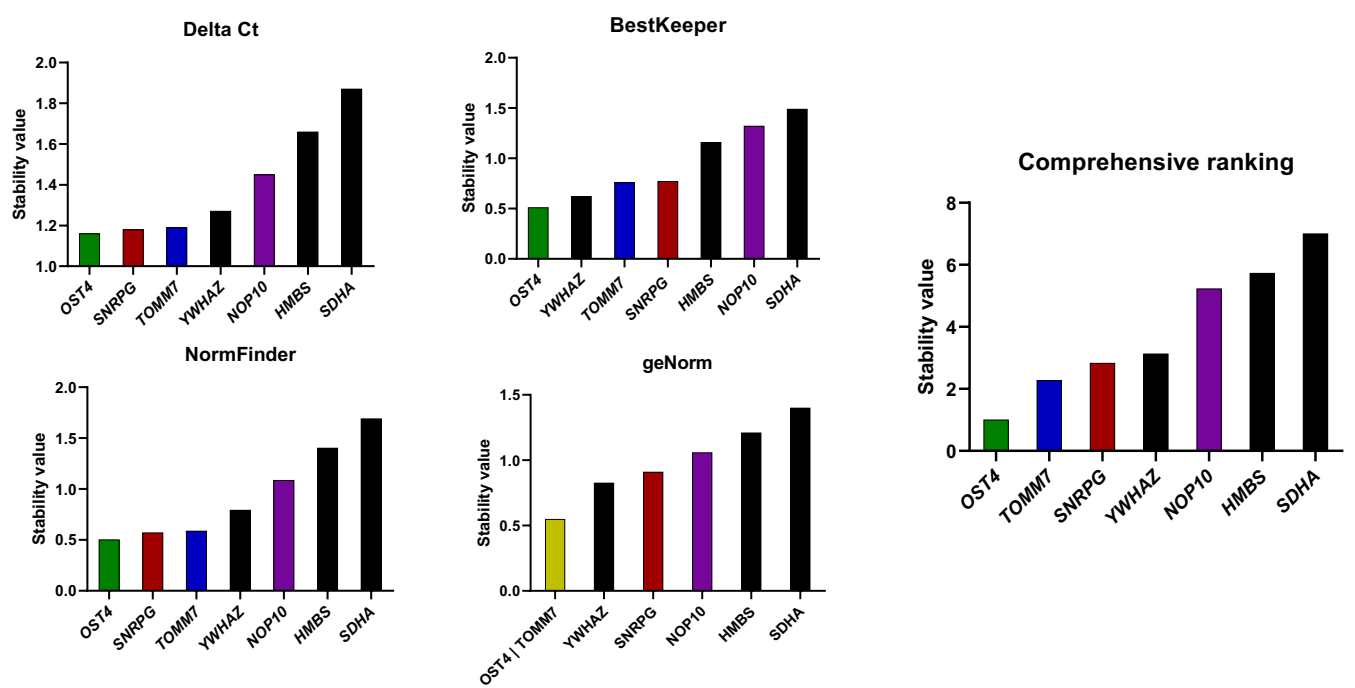

**B**

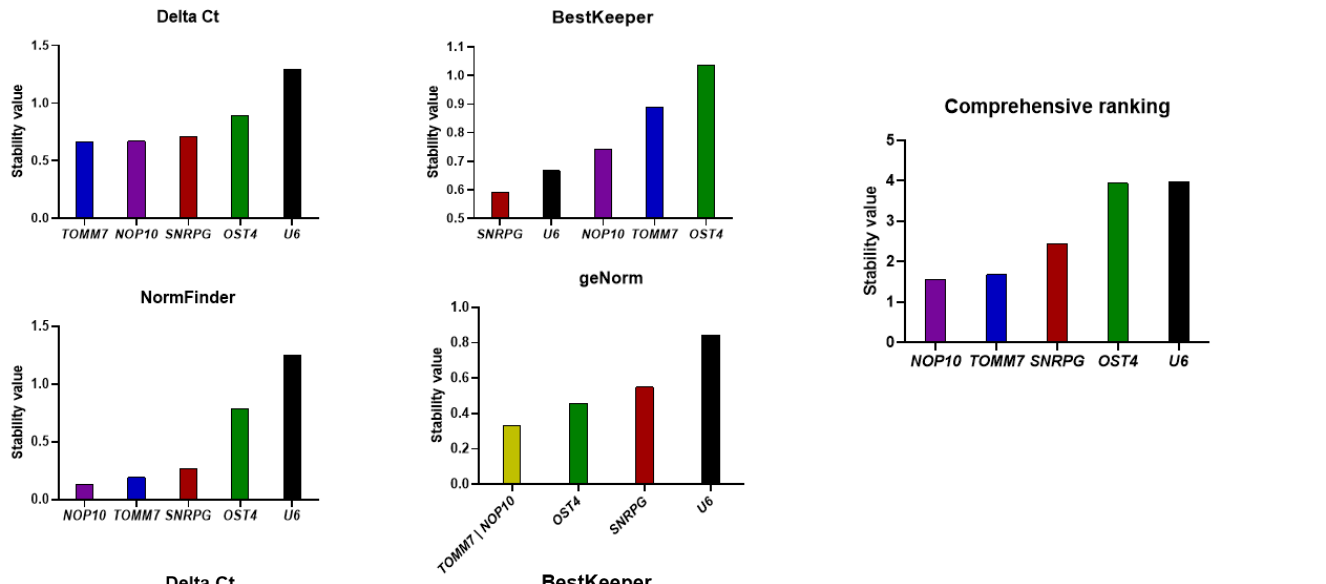

**C**

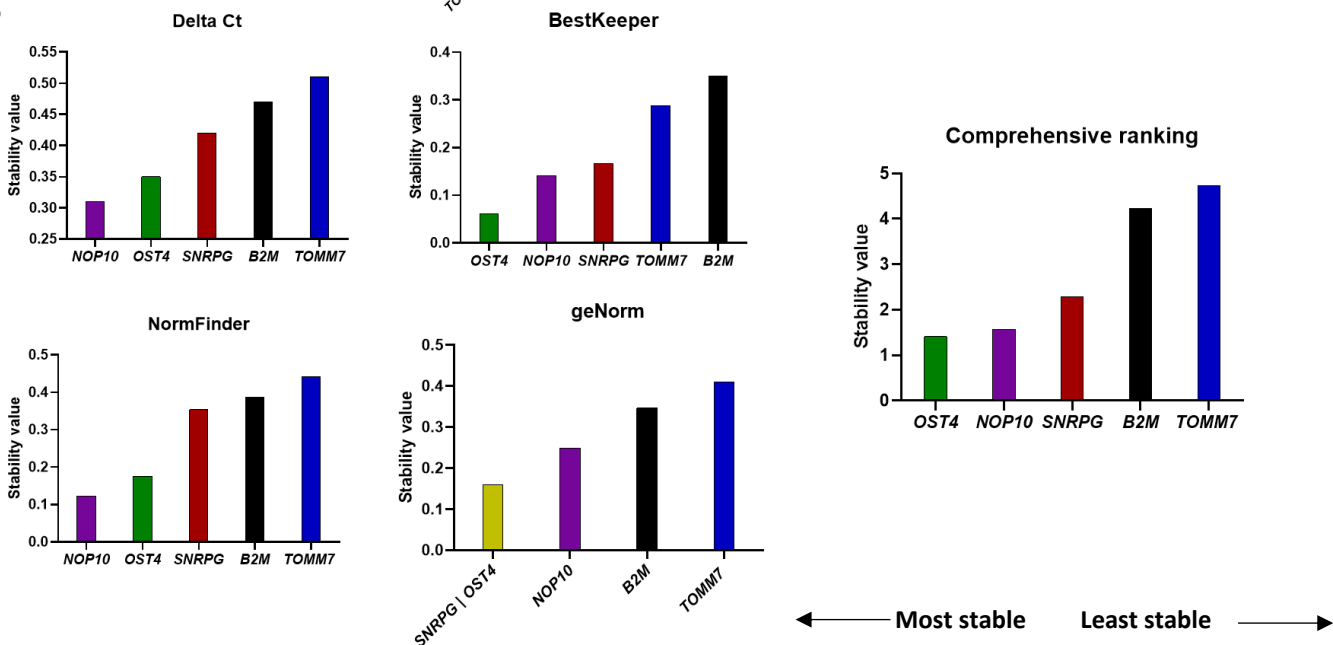

← Most stable      Least stable →

### SK-OV-3

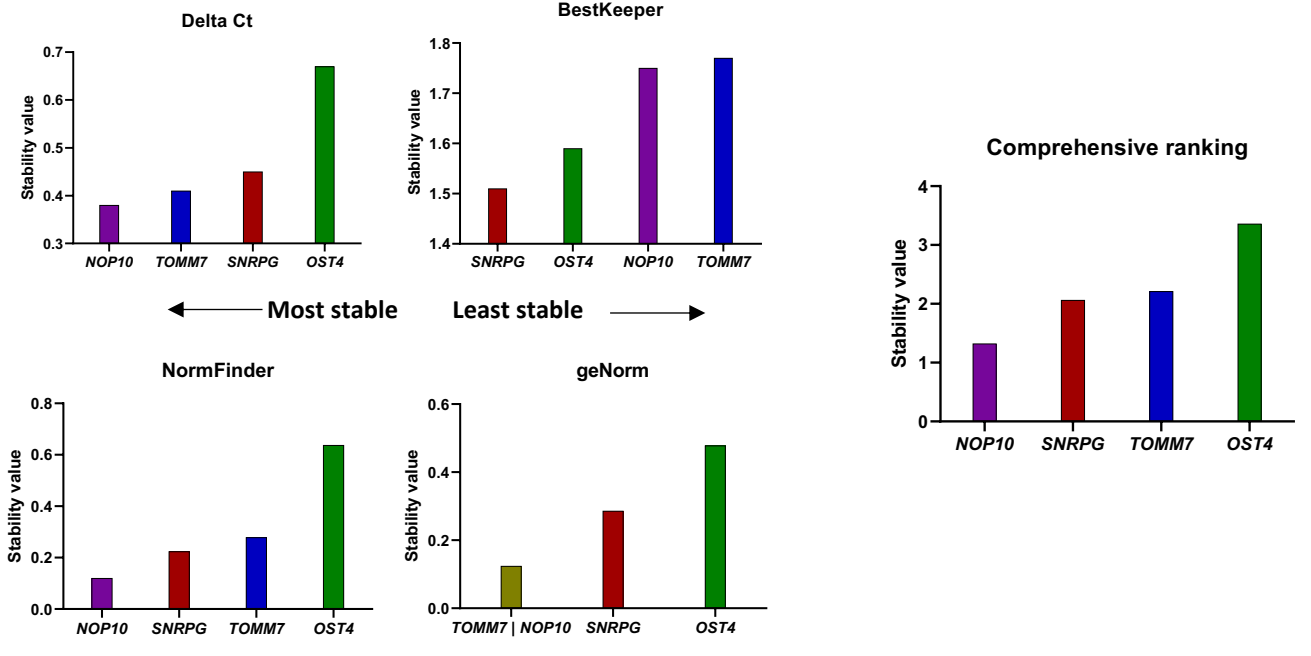

### MCF7

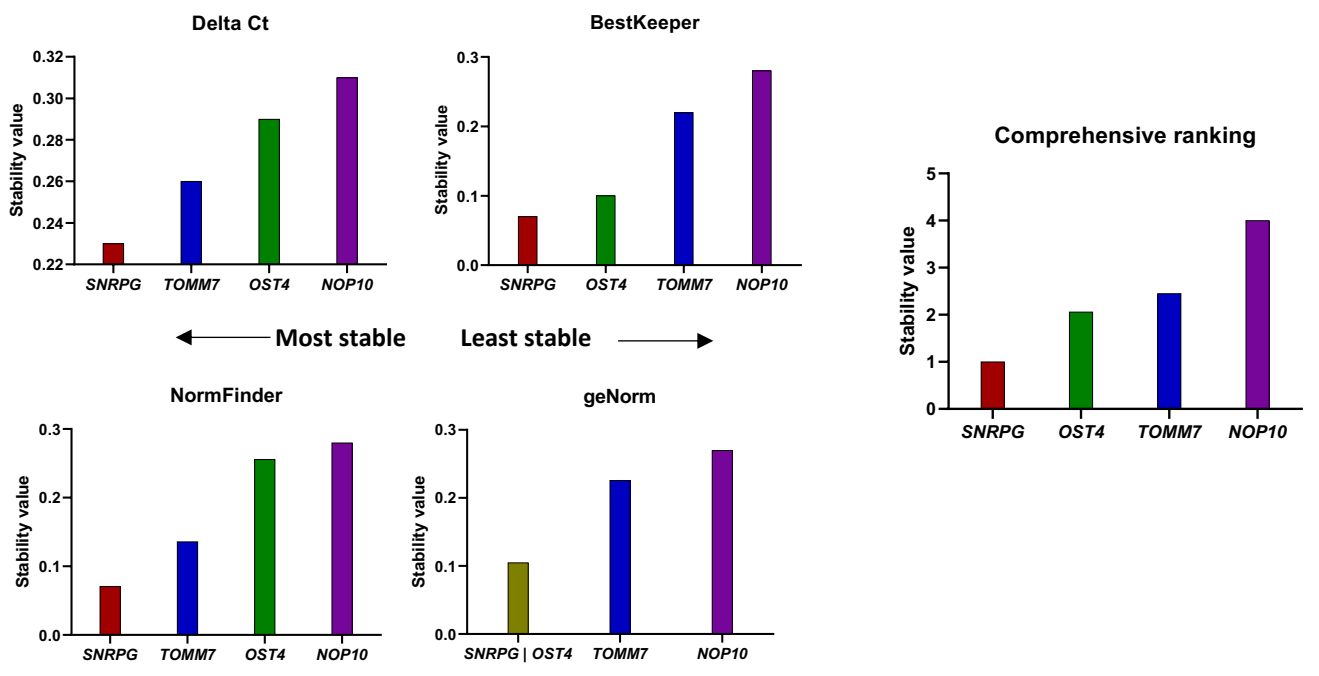

# A549

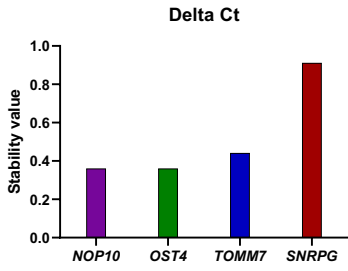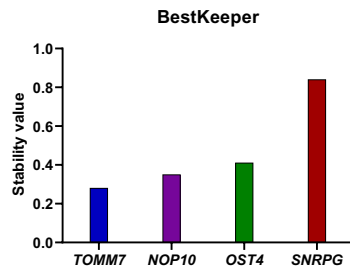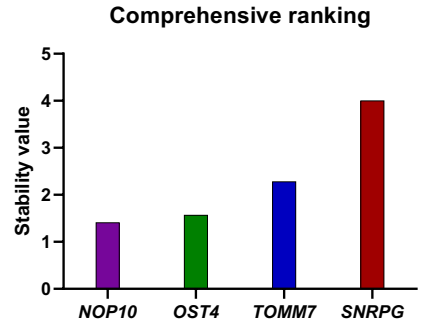

← Most stable      Least stable →

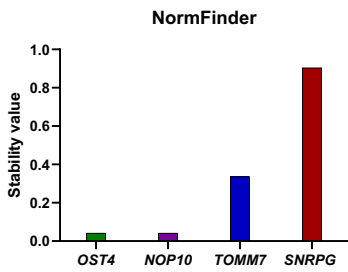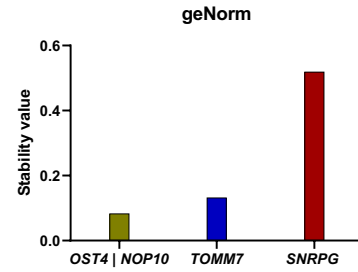

# HCT 116

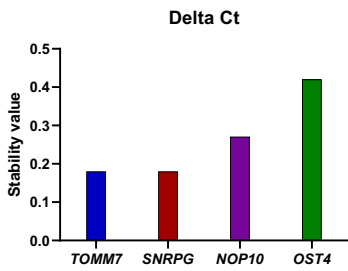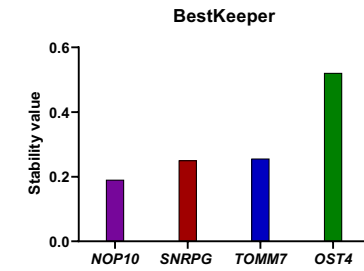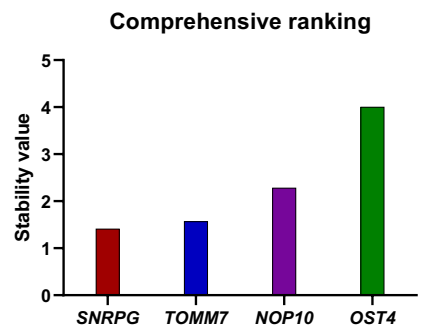

← Most stable      Least stable →

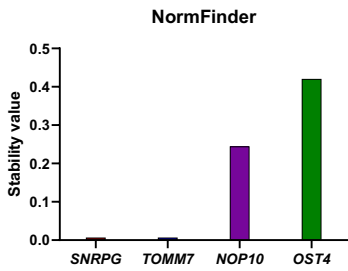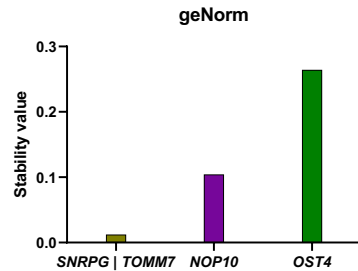



# U-87 MG

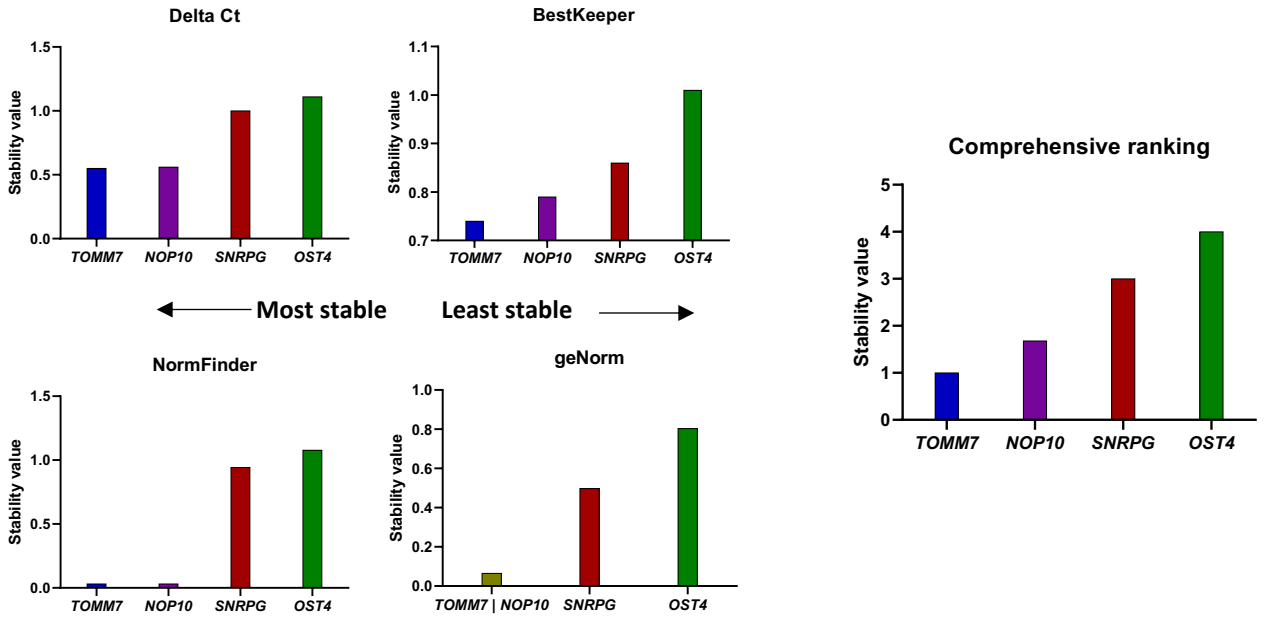

# TCM

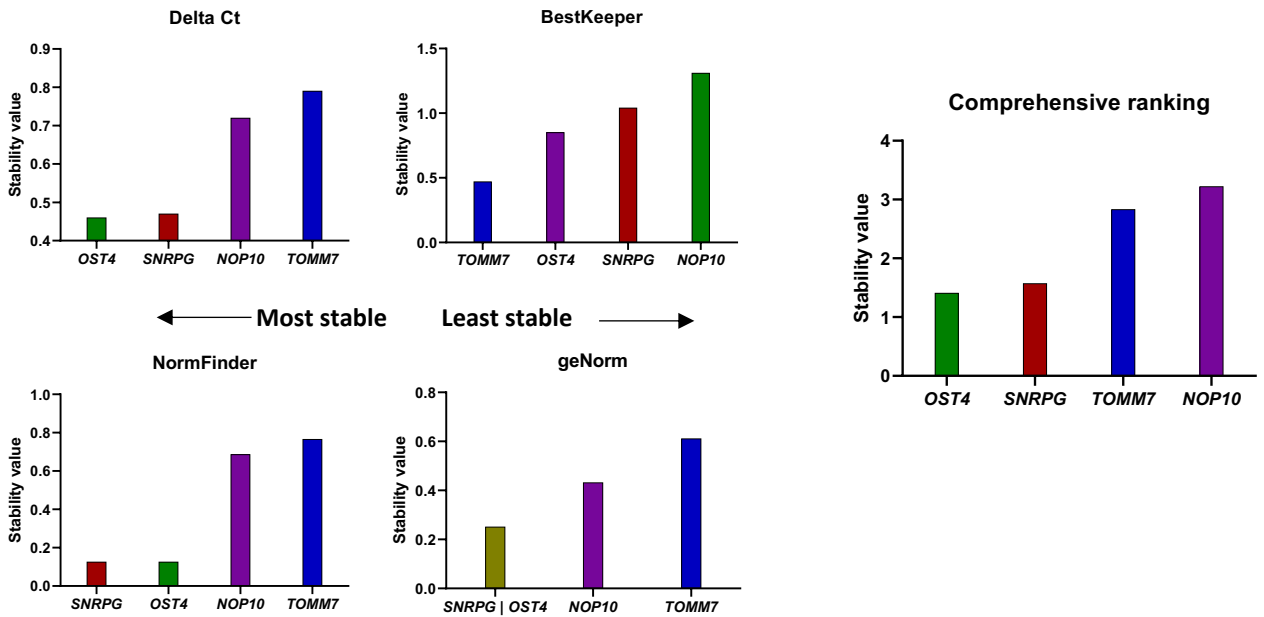

## PANC-1

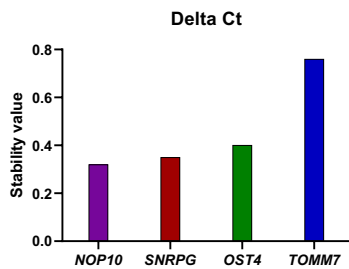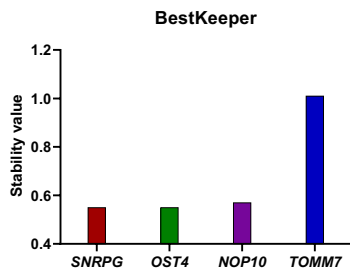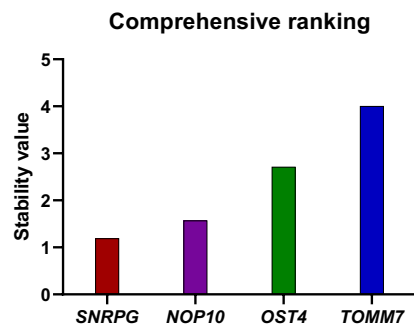

← **Most stable**      **Least stable** →

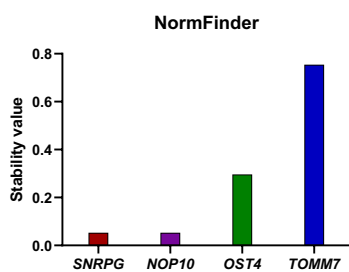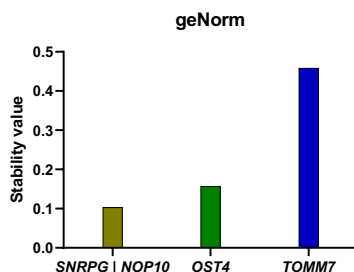

## Urine EVs

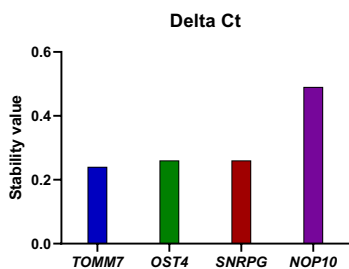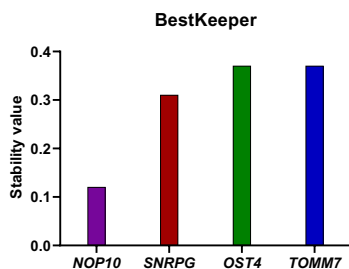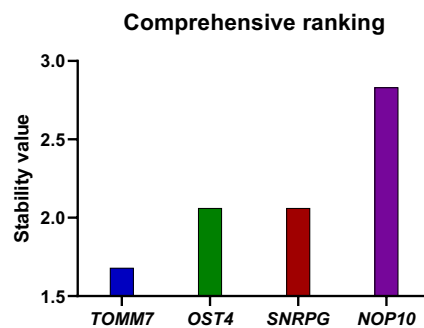

← **Most stable**      **Least stable** →

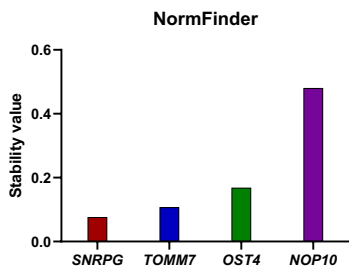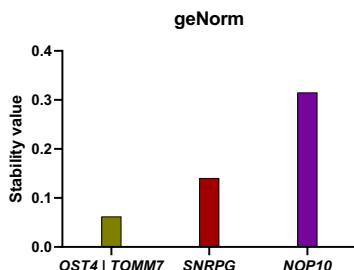

# BEAS-2B

### Delta Ct

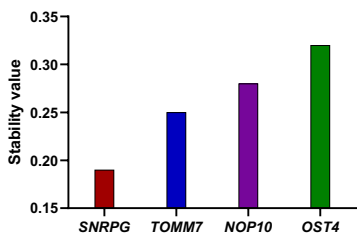

### BestKeeper

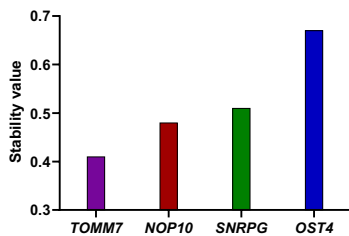

← Most stable      Least stable →

### NormFinder

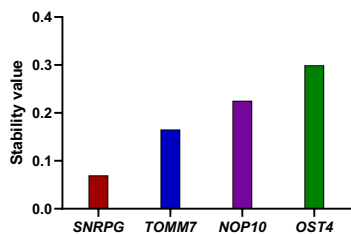

### geNorm

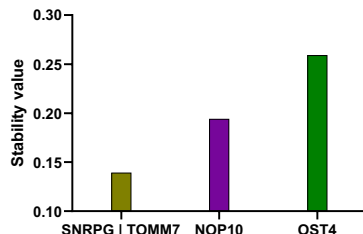

### Comprehensive ranking

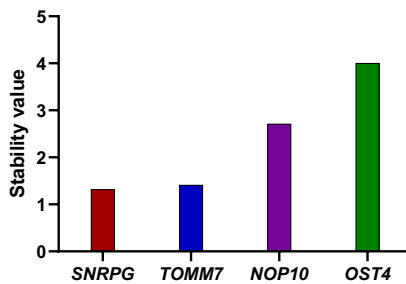

Fig S16

**A**

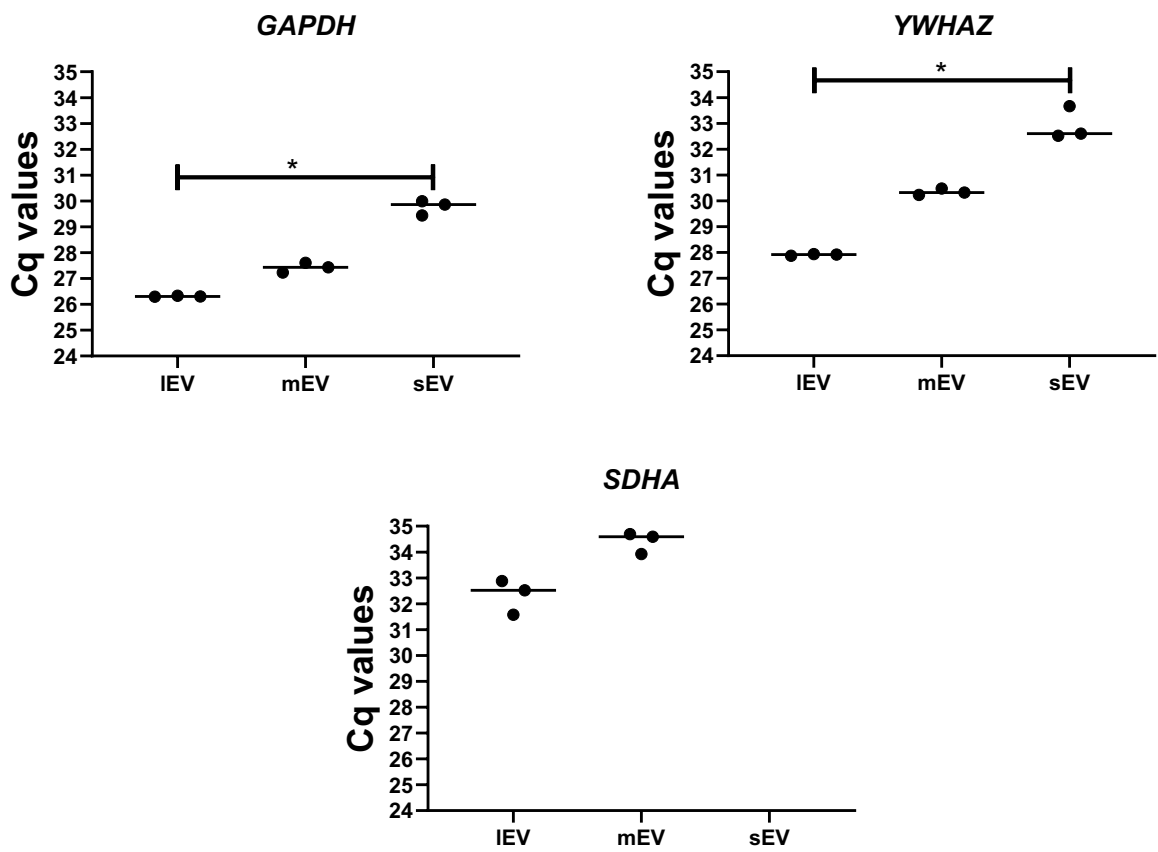

**B**

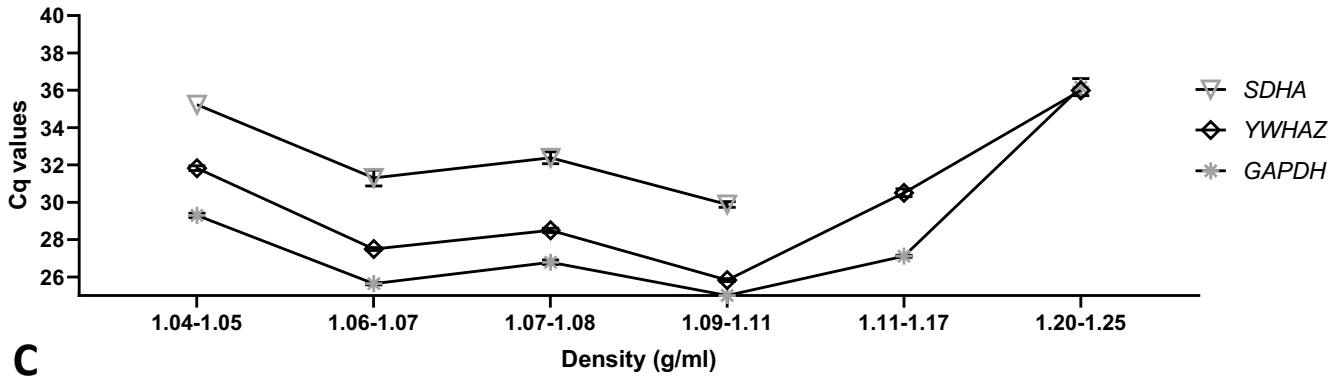

**C**

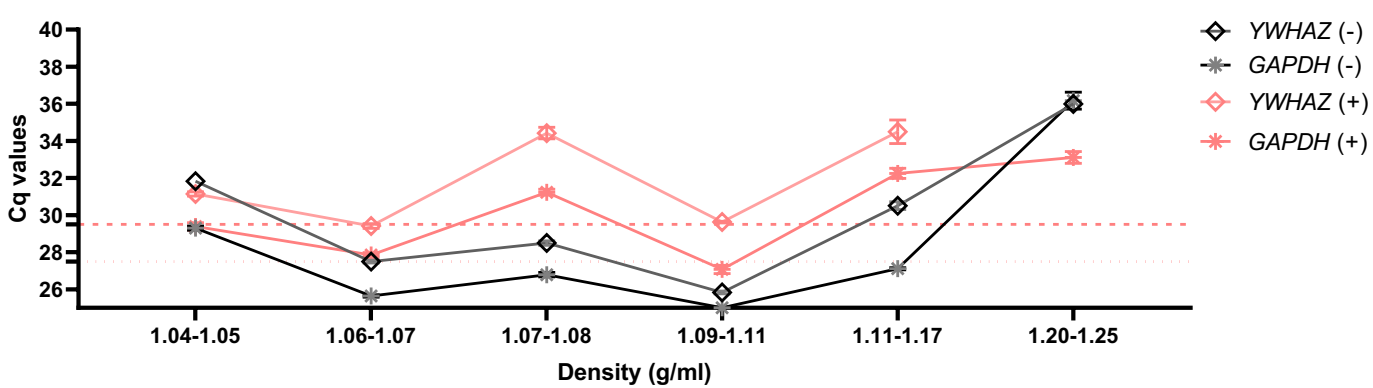

Fig S17

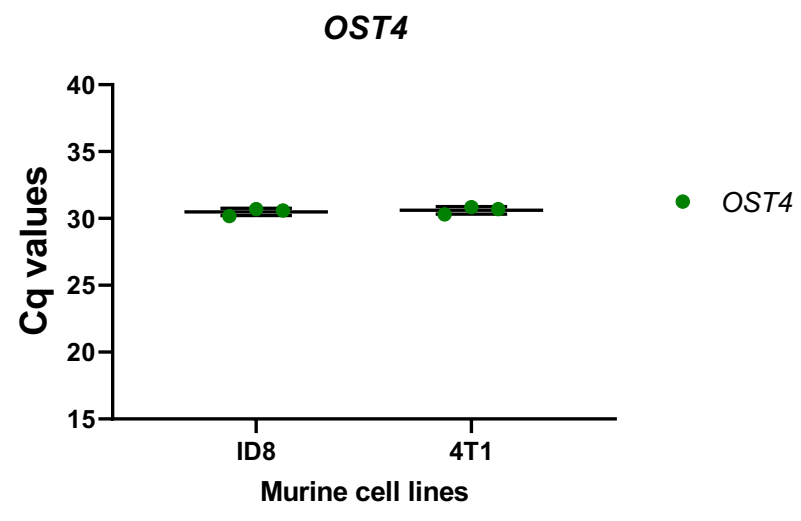

Supplement: JEV2-13-e12421-s002.pdf [file JEV2-13-e12421-s002.pdf]
